# Supplementary material for: The Regional Specific Alterations in BBB Permeability are Relevant to the Differential Responses of 67-kDa LR Expression in Endothelial Cells and Astrocytes Following Status Epilepticus
Source: PubMed Central journal article supplement (PMC6929072; doi:10.3390/ijms20236025), 2019-11-29
Supplement: ijms-20-06025-s001.pdf [file ijms-20-06025-s001.pdf]

## **Supplementary information**

### **The regional specific alterations in BBB permeability are relevant to the differential responses of 67-kDa LR expression in endothelial cells and astrocytes following status epilepticus**

Hana Park<sup>1,2</sup>, Tae-Cheon Kang<sup>1,2\*</sup>

<sup>1</sup>Department of Anatomy and Neurobiology, College of Medicine, Hallym University, Chuncheon 24252,  
South Korea

<sup>2</sup>Institute of Epilepsy Research, College of Medicine, Hallym University, Chuncheon 24252, South Korea

Running title: 67-kDa LR-mediated regional specific vasogenic edema

\* Correspondence to: T. -C. Kang, Department of Anatomy and Neurobiology, College of Medicine, Hallym University, Chuncheon, Kangwon-Do 24252, South Korea; Tel: +82-33-248-2524; Fax: +82-33-248-2525; E-mail: tckang@hallym.ac.kr

**Fig. 1C**

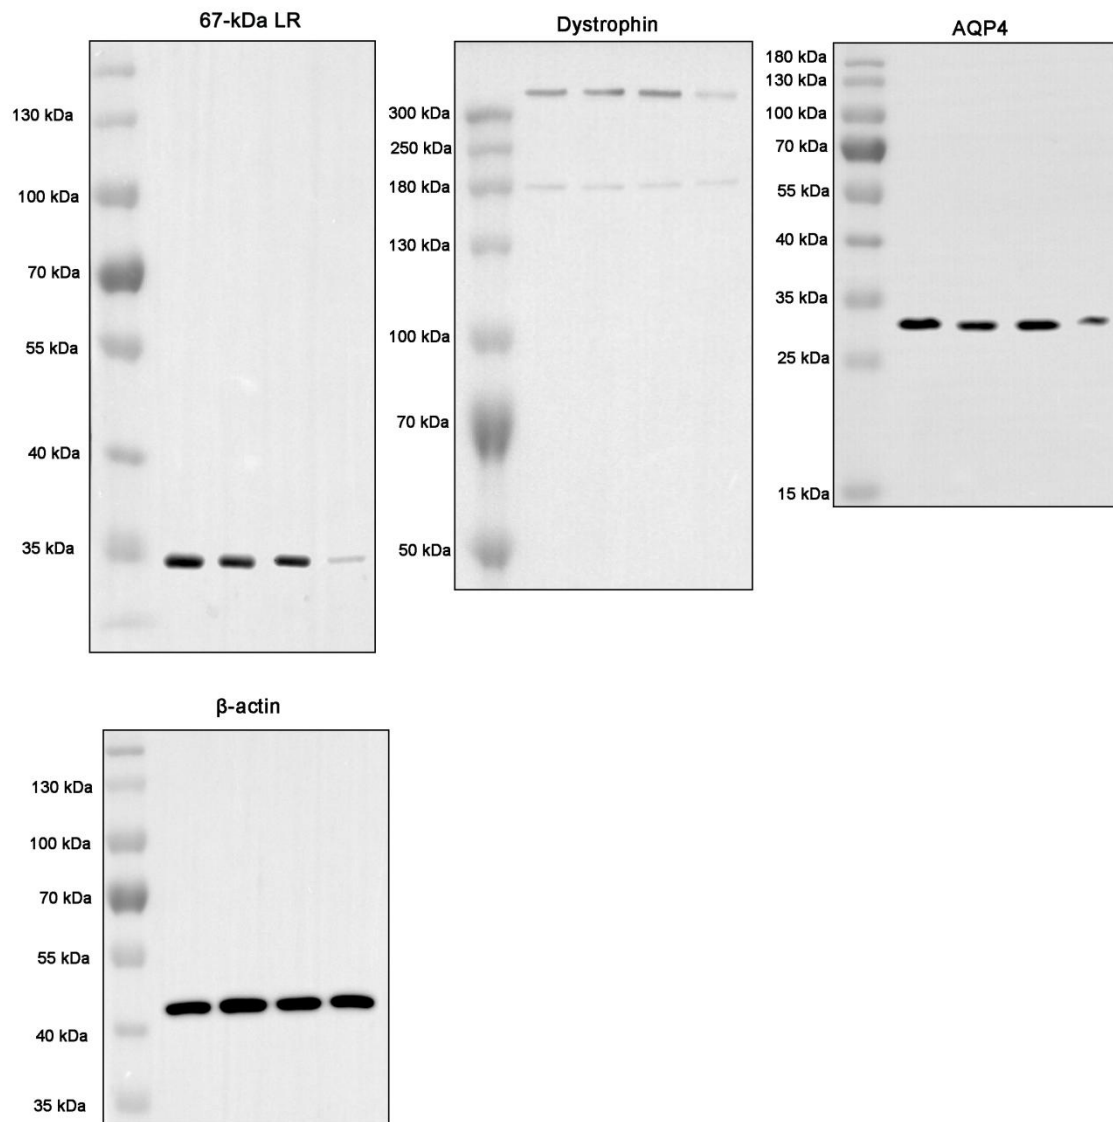

Supplementary Fig. 1. Full-length gel images of western blot data in Fig. 1C.

Fig. 4A

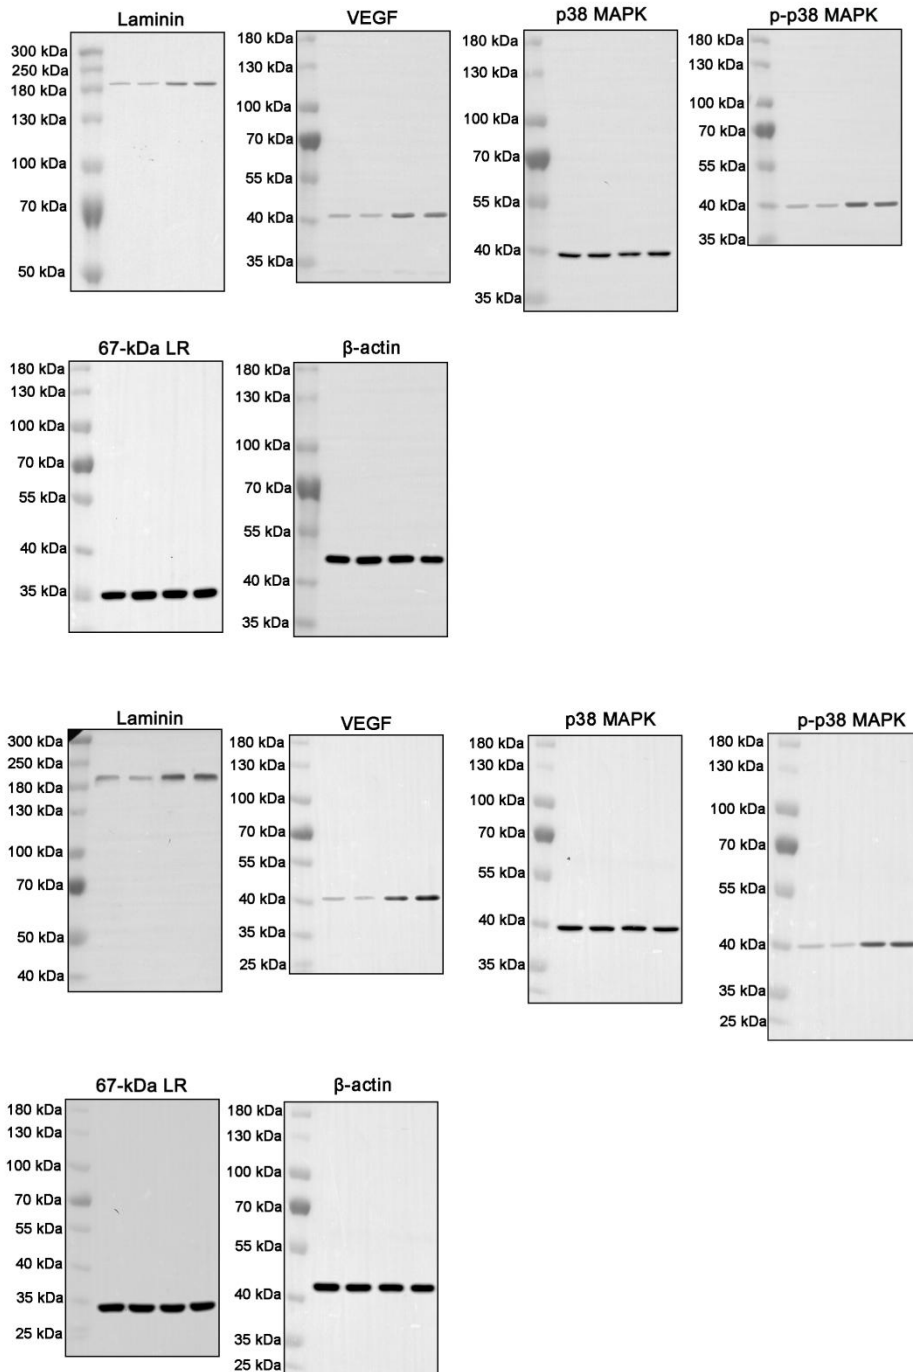

Supplementary Fig. 2. Full-length gel images of western blot data in Fig. 4A.

**Fig. 6A**

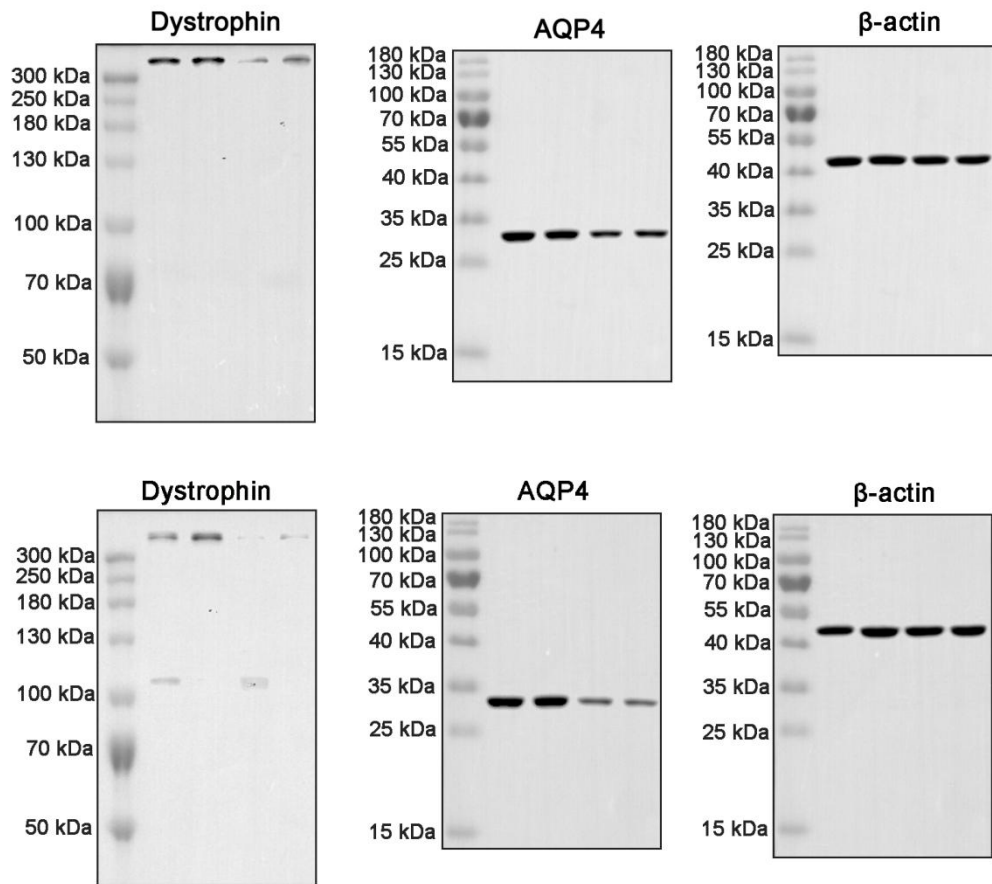

**Fig. 6C**

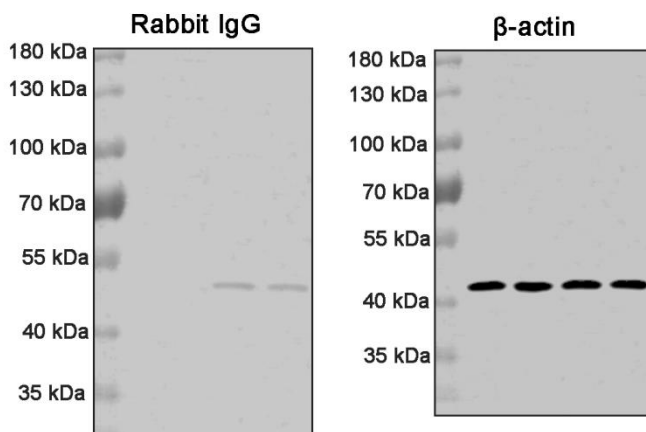

Supplementary Fig. 3. Full-length gel images of western blot data in Figs. 6A and 6C.

**Fig. 7A**

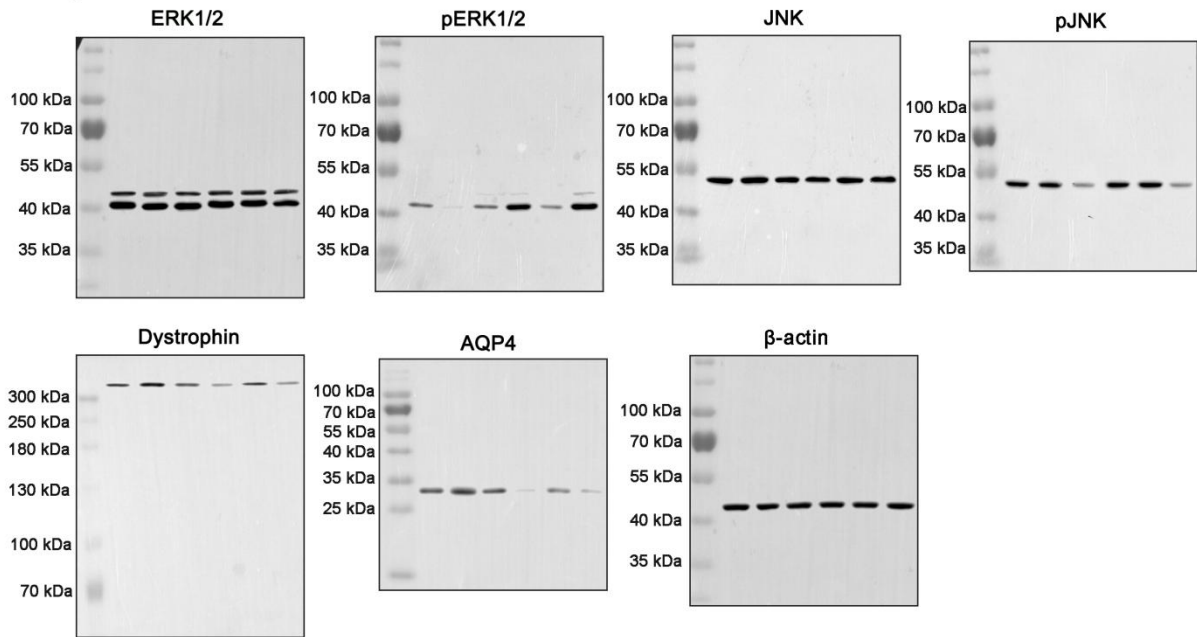

**Fig. 9A**

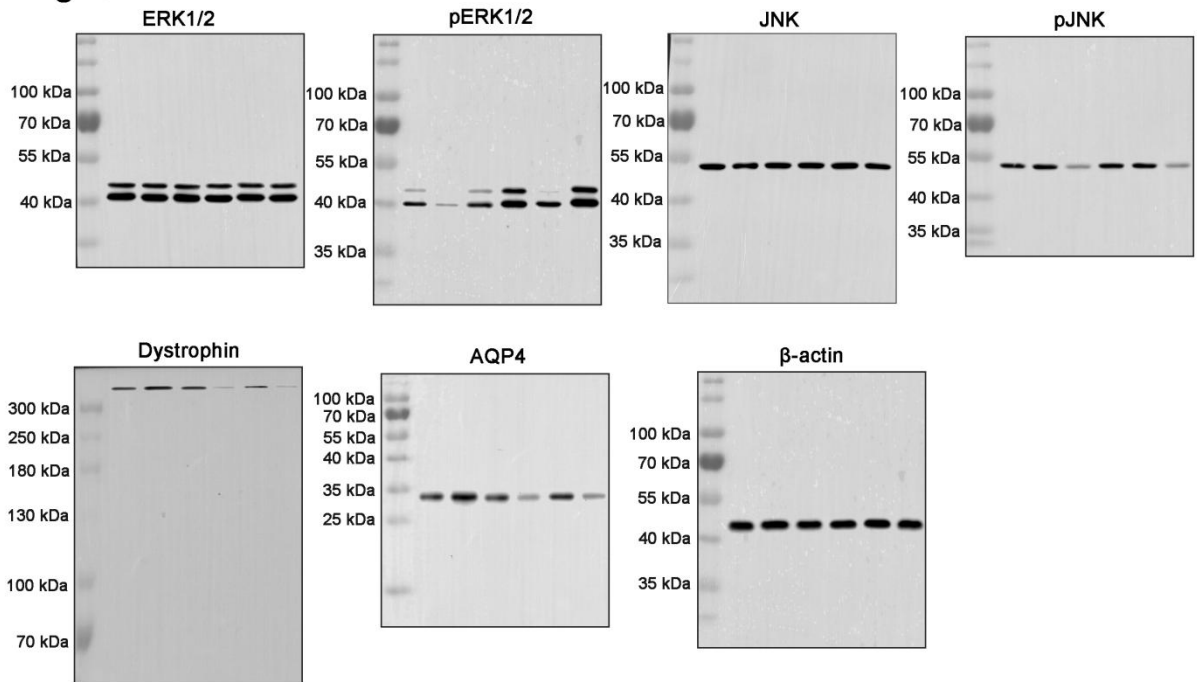

Supplementary Fig. 4. Full-length gel images of western blot data in Figs. 7A and 9A.

**Fig. 11A**

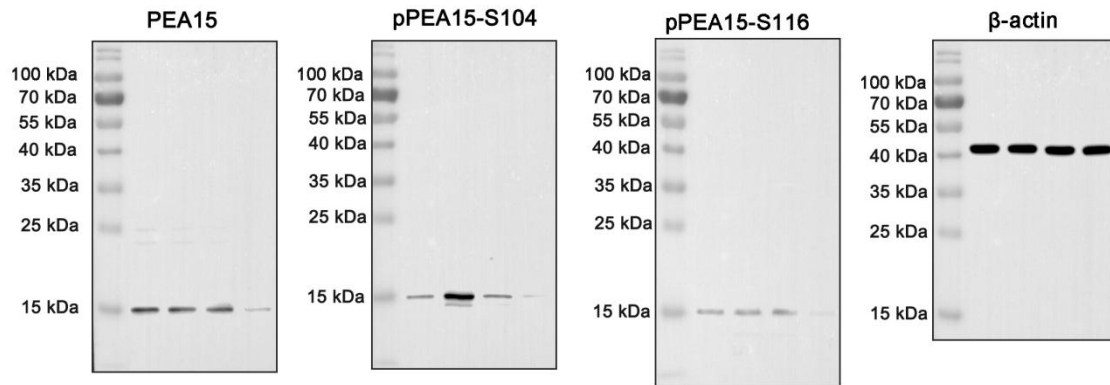

**Fig. 11C**

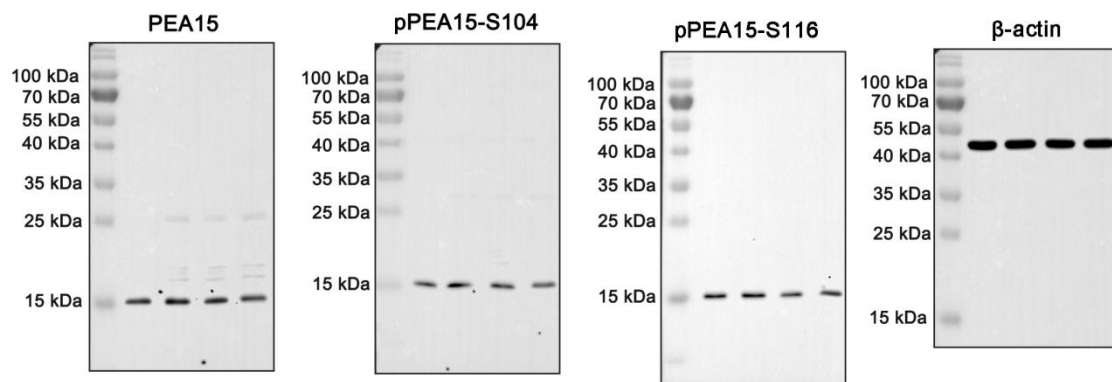

Supplementary Fig. 5. Full-length gel images of western blot data in Fig. 11A and 11C.
